# Supplementary material
Source: Royal Society of Chemistry journal article supplement (doi:10.1039/d6va00064a)
Supplement: d6va00064a2.xlsx [file d6va00064a2.xlsx]

## Sheet: intro page
	Supplementary Information
	Wildland fire impacts on temporal and spatial patterns
	of trace elements in smelter-affected semiarid soils
	Vojtěch Ettler1*, Martin Mihaljevič1, Tereza Zádorová2, Daniel Žížala3,
	Aleš Vaněk2, Vít Penížek2, Bohdan Kříbek4, Ondra Sracek5 & Ben Mapani6
	1. Institute of Geochemistry, Mineralogy and Mineral Resources, Faculty of Science, Charles University, Albertov 6, 128 00 Prague 2, Czech Republic (*corresponding author, E-mail: ettler@natur.cuni.cz)
	2. Department of Soil Science and Soil Protection, Faculty of Agrobiology, Food and Natural Resources, Czech University of Life Sciences Prague, Kamýcká 129, 165 00 Prague 6, Czech Republic
	3. Remote Sensing and Pedometrics Laboratory, Research Institute for Soil and Water Conservation, Žabovřeská 250, 156 00 Prague 5, Czech Republic
	4. Czech Geological Survey, Geologická 6, 152 00 Prague 5, Czech Republic
	5. Department of Geology, Faculty of Science, Palacký University in Olomouc, 17. listopadu 12, 771 46 Olomouc, Czech Republic
	6. Department of Civil, Mining and Process Engineering, Namibia University of Science and Technology, Windhoek, Namibia
	large tables
	Table S4
	Table S5
	Table S6
	Table S7

## Sheet: total concentrations
	Table S4. Elemental concentrations and pH values in grass, litter, topsoils, subsoils, and bedrocks from the burned and unburned sites. ND – not determined.
	Code		pH	Corg	Cinorg	Stot	As	Cd	Co	Cr	Cu	Hg	Ni	Pb	Sb	Ti	V	Zn
				(%)	(%)	(%)	mg/kg	mg/kg	mg/kg	mg/kg	mg/kg	mg/kg	mg/kg	mg/kg	mg/kg	mg/kg	mg/kg	mg/kg
	TB-1G	grass	ND	42.1302	˂0.01	0.09834	6.46658	0.450717	0.670519	48.1664	10.9588	0.0286831	21.6886	7.07754	0.412396	42.9972	0.463321	32.9758
	TB-2G	grass	ND	42.8965	˂0.01	0.1223	8.95265	0.441608	0.553768	41.6473	12.0307	0.048706	18.5547	9.70436	0.451701	40.3246	0.464227	57.1861
	TB-3G	grass	ND	42.5232	˂0.01	0.09002	4.56623	0.512801	0.442249	29.4598	10.461	0.0343454	15.2618	4.15727	0.268241	26.3449	0.142984	54.589
	TB-4G	grass	ND	43.6693	˂0.01	0.3919	3.54901	0.334281	0.398689	23.6982	7.34124	0.0169359	11.6226	3.5029	0.169774	24.761	0.290701	64.8761
	TB-5G	grass	ND	42.7822	˂0.01	0.1045	3.32383	0.312962	0.388344	26.0191	5.91202	0.0277079	11.6486	4.28786	0.157325	29.5997	0.418592	69.1566
	TB-6G	grass	ND	43.6212	˂0.01	0.09242	2.70099	0.16097	0.197411	10.4209	4.82896	0.0175113	5.23523	1.12485	0.117885	23.3669	0.0922022	28.1978
	TB-7-9-G	grass	ND	42.2975	˂0.01	0.1038	3.90737	0.0724891	0.244633	16.2892	4.66737	0.0227156	9.02096	1.69861	0.234179	38.4361	0.282834	26.6792
	TB-10-12-G	grass	ND	41.9294	˂0.01	0.1142	4.02304	0.145674	0.467309	36.4872	6.11237	0.0100861	18.4582	1.93952	0.413423	44.6465	0.465625	64.5272
	min			41.9294	ND	0.09002	2.70099	0.0724891	0.197411	10.4209	4.66737	0.0100861	5.23523	1.12485	0.117885	23.3669	0.0922022	26.6792
	max			43.6693	ND	0.3919	8.95265	0.512801	0.670519	48.1664	12.0307	0.048706	21.6886	9.70436	0.451701	44.6465	0.465625	69.1566
	median			42.6527	ND	0.10415	3.96521	0.323622	0.420469	27.7395	6.7268	0.0252118	13.4552	3.83008	0.25121	34.0179	0.354646	55.8876
	mean			42.7312	ND	0.139685	4.68622	0.303938	0.420365	29.0235	7.78906	0.0258364	13.9363	4.18661	0.278115	33.8096	0.327561	49.7735
	Code		pH	Corg	Cinorg	Stot	As	Cd	Co	Cr	Cu	Hg	Ni	Pb	Sb	Ti	V	Zn
				(%)	(%)	(%)	mg/kg	mg/kg	mg/kg	mg/kg	mg/kg	mg/kg	mg/kg	mg/kg	mg/kg	mg/kg	mg/kg	mg/kg
	TB-1O	litter	6.48	35.2395	1.2977	0.1605	18.2979	0.421455	2.00804	33.7251	21.1723	0.0366554	11.1808	12.218	2.93865	514.694	2.10338	35.3493
	TB-2O	litter	6.133	40.5391	0.3124	0.9247	9.91726	0.255912	0.649589	5.86928	14.4064	0.011777	3.13919	7.2411	0.85101	242.664	0.0421726	23.8138
	TB-3O	litter	6.287	33.0849	0.4347	0.3185	11.4941	0.531637	1.1041	20.571	27.1038	0.0152418	8.68643	13.3698	1.61848	417.817	1.0288	51.5339
	TB-4O	litter	6.121	22.061	0.0318	0.04985	12.2427	0.719186	3.34834	103.327	22.2174	0.027289	32.9965	19.0592	1.16084	820.761	16.9193	34.0607
	TB-5O	litter	5.802	30.9374	˂0.01	0.07932	12.6548	1.06037	2.41629	29.8963	30.0616	0.030013	11.5611	21.7173	1.72188	679.251	10.7495	39.5861
	TB-6O	litter	6.431	37.0424	0.6785	0.1112	11.6641	0.829863	1.75285	44.9475	22.1348	0.0335869	15.1865	17.4245	1.96383	497.132	4.27299	38.401
	TB-7O	burned litter	7.85	20.6535	0.4196	0.03578	10.9915	0.501654	13.3649	62.0786	39.989	0.00687538	22.0205	23.0628	1.47667	778.385	11.5806	421.416
	TB-8O	burned litter	7.76	7.8284	0.0485	0.0175	13.0997	1.20719	3.34519	71.4524	35.239	0.020464	25.9871	53.6634	1.49934	1043.48	24.3639	65.5187
	TB-9O	burned litter	7.803	5.8175	0.1402	0.02926	9.34779	0.932909	3.78693	164.956	25.0257	0.00556883	52.1246	31.2661	1.36871	1204.34	26.6923	70.9092
	TB-10O	litter	6.07	36.3068	0.0321	0.04828	5.87715	0.336902	1.0021	43.3175	12.8633	0.013139	16.11	8.16601	0.835394	372.211	5.01386	64.3347
	TB-11O	litter	7.195	13.7755	0.618	0.06475	8.22151	0.517803	2.37934	82.3784	19.2296	0.0287245	25.4117	17.2349	2.32139	1161.68	18.873	30.263
	TB-12O	litter	6.728	14.296	0.4164	0.04481	7.77158	0.391587	2.95249	91.991	16.2392	0.0184506	33.2752	14.1762	1.94267	1147.94	16.8579	29.8328
	min		5.802	5.8175	˂0.01	0.0175	5.87715	0.255912	0.649589	5.86928	12.8633	0.00556883	3.13919	7.2411	0.835394	242.664	0.0421726	23.8138
	max		7.85	40.5391	1.2977	0.9247	18.2979	1.20719	13.3649	164.956	39.989	0.0366554	52.1246	53.6634	2.93865	1204.34	26.6923	421.416
	median		6.4555	26.4992	0.4164	0.0573	11.2428	0.52472	2.39782	53.513	22.1761	0.0194573	19.0652	17.3297	1.55891	728.818	11.1651	38.9936
	mean		6.72167	24.7985	0.402718	0.157038	10.965	0.642206	3.17585	62.8758	23.8068	0.0206488	21.4733	19.8833	1.64157	740.029	11.5415	75.4182
	Code		pH	Corg	Cinorg	Stot	As	Cd	Co	Cr	Cu	Hg	Ni	Pb	Sb	Ti	V	Zn
				(%)	(%)	(%)	mg/kg	mg/kg	mg/kg	mg/kg	mg/kg	mg/kg	mg/kg	mg/kg	mg/kg	mg/kg	mg/kg	mg/kg
	TB-1A	topsoil	8.272	4.439	2.662	˂0.01	9.74012	0.766093	3.09634	15.919	24.1274	0.0214574	6.94629	28.3374	5.58029	1328.62	8.37397	42.8655
	TB-2A	topsoil	7.91	4.27	2.3564	˂0.01	10.0563	0.978853	2.83831	13.1068	25.0541	0.0224405	5.65254	34.657	3.79144	1130.13	7.21014	43.2859
	TB-3A	topsoil	8.064	4.4479	2.3579	˂0.01	12.186	1.14805	3.08269	13.6961	29.332	0.0260889	5.89017	40.7453	4.11732	1232.07	7.39386	41.3867
	TB-4A	topsoil	7.223	1.2648	˂0.01	˂0.01	20.1056	0.841106	4.80409	25.3989	24.5138	0.0299415	9.91338	31.671	1.24084	1530.85	34.2872	34.5643
	TB-5A	topsoil	8.02	3.8268	0.4201	˂0.01	26.1638	2.26131	4.83154	25.5686	47.1443	0.042378	10.1915	67.4396	6.39935	1454.26	30.7897	64.3455
	TB-6A	topsoil (char)	6.94	60.0029	0.3322	0.1148	6.09269	0.914442	1.40043	28.6737	20.288	0.0382783	11.7434	17.4523	3.84213	342.121	2.87741	14.9836
	TB-7A	topsoil	8.294	3.3034	1.1117	˂0.01	6.77749	1.3913	1.7878	12.5122	25.4625	0.0115214	5.02258	57.4305	3.25902	1145.8	20.8961	65.5381
	TB-8A	topsoil	8.096	2.8754	0.0197	˂0.01	12.1932	1.1144	3.09945	19.4505	28.3194	0.0324575	7.9117	54.4289	0.850056	1164.16	26.4143	49.923
	TB-9A	topsoil	7.821	2.713	0.0131	˂0.01	9.03451	0.842651	2.83332	19.6153	19.0298	0.0128178	7.28133	34.2541	0.698177	1227.84	26.0028	52.4965
	TB-10A	topsoil	8.34	1.9076	1.0322	˂0.01	8.68337	0.471501	2.49477	17.7313	13.4858	0.0144064	6.14835	21.6489	2.70255	1815.05	25.8538	25.7943
	TB-11A	topsoil	7.647	5.4682	0.7784	0.01917	7.56162	0.469177	2.01023	15.2994	13.4112	0.0254141	5.25863	20.0095	2.44301	1450.3	22.4051	28.5677
	TB-12A	topsoil	7.983	2.6056	0.3412	˂0.01	7.55152	0.404424	2.50244	15.8586	13.5281	0.0170954	5.66899	20.5681	1.85771	1850.39	24.8003	30.3527
	min		6.94	1.2648	˂0.01	˂0.01	6.09269	0.404424	1.40043	12.5122	13.4112	0.0115214	5.02258	17.4523	0.698177	342.121	2.87741	14.9836
	max		8.34	60.0029	2.662	0.1148	26.1638	2.26131	4.83154	28.6737	47.1443	0.042378	11.7434	67.4396	6.39935	1850.39	34.2872	65.5381
	median		8.0015	3.5651	0.7784	0.066985	9.38732	0.878547	2.83582	16.8252	24.3206	0.0239273	6.54732	32.9626	2.98078	1280.35	23.6027	42.1261
	mean		7.88417	8.09372	1.03863	0.066985	11.3455	0.966942	2.89845	18.5692	23.6414	0.0245248	7.30241	35.7202	3.06516	1305.97	19.7754	41.1753
	Code		pH	Corg	Cinorg	Stot	As	Cd	Co	Cr	Cu	Hg	Ni	Pb	Sb	Ti	V	Zn
				(%)	(%)	(%)	mg/kg	mg/kg	mg/kg	mg/kg	mg/kg	mg/kg	mg/kg	mg/kg	mg/kg	mg/kg	mg/kg	mg/kg
	TB-1B	subsoil	8.438	4.0192	2.5333	˂0.01	8.25955	0.73652	3.35508	15.474	16.1034	0.0214573	7.44548	24.3692	4.60151	1326.06	8.57096	30.5527
	TB-2B	subsoil	8.285	3.8936	2.0456	˂0.01	8.07249	1.04298	3.11237	14.1296	18.9242	0.0293945	6.30503	33.5861	3.84983	1226.32	7.56824	32.5027
	TB-3B	subsoil	8.362	3.5359	2.2011	˂0.01	9.69202	1.20063	2.8997	12.5776	18.6574	0.0335834	5.82532	38.3302	2.65521	1145.17	6.85892	28.8563
	TB-4B	subsoil	7.24	0.9398	˂0.01	˂0.01	22.7147	1.10123	4.8119	25.801	23.3649	0.0388937	10.0849	37.2772	0.992868	1522.9	34.0957	35.727
	TB-5B	subsoil	8.158	3.9528	0.3855	˂0.01	28.8592	2.99974	5.18838	27.3594	51.629	0.0589243	10.5649	90.0393	3.1597	1529.53	32.8675	76.1749
	TB-6B	subsoil	7.905	5.8985	0.9615	0.01047	21.4076	2.25317	4.44747	18.8158	43.3388	0.0400545	8.11468	69.8821	8.48138	1312.98	19.715	55.9997
	TB-7B	subsoil	8.3	2.4615	1.0447	˂0.01	7.74703	1.37296	2.0025	14.6114	27.3192	0.0175475	5.52874	57.6823	3.18149	1290.18	21.9435	54.2318
	TB-8B	subsoil	7.745	2.7465	0.0076	˂0.01	12.7197	1.37169	3.40819	21.4271	33.4287	0.0400302	8.4715	64.5146	1.44997	1263.7	28.5727	57.1315
	TB-9B	subsoil	7.755	1.4174	˂0.01	˂0.01	8.5425	0.845843	2.7908	18.3367	14.951	0.0226202	6.77504	32.6168	0.781941	1328.23	25.9792	42.1433
	TB-10B	subsoil	8.45	1.9544	1.1413	˂0.01	8.11885	0.429866	2.69282	15.9865	10.0837	0.0150461	6.26919	19.6387	2.51631	1646.35	24.9464	20.6679
	TB-11B	subsoil	8.041	3.5766	0.8916	˂0.01	7.51591	0.56336	2.12447	15.6796	11.1674	0.0261589	5.38006	21.0699	2.76461	1572.85	24.4787	27.1642
	TB-12B	subsoil	8.2	1.9717	0.4721	˂0.01	8.06307	0.500598	2.64801	18.0405	12.3705	0.0185182	6.41748	21.1219	1.90409	1976.88	27.4759	27.9921
	min		7.24	0.9398	˂0.01	ND	7.51591	0.429866	2.0025	12.5776	10.0837	0.0150461	5.38006	19.6387	0.781941	1145.17	6.85892	20.6679
	max		8.45	5.8985	2.5333	ND	28.8592	2.99974	5.18838	27.3594	51.629	0.0589243	10.5649	90.0393	8.48138	1976.88	34.0957	76.1749
	median		8.179	3.1412	1.0031	ND	8.40102	1.07211	3.00603	17.0135	18.7908	0.0277767	6.59626	35.4316	2.70991	1327.15	24.7126	34.1148
	mean		8.07325	3.03066	1.16843	ND	12.6427	1.20155	3.29014	18.1866	23.4449	0.0301857	7.26519	42.5107	3.02824	1428.43	21.9227	40.762
	Code		pH	Corg	Cinorg	Stot	As	Cd	Co	Cr	Cu	Hg	Ni	Pb	Sb	Ti	V	Zn
				(%)	(%)	(%)	mg/kg	mg/kg	mg/kg	mg/kg	mg/kg	mg/kg	mg/kg	mg/kg	mg/kg	mg/kg	mg/kg	mg/kg
	TB-1OB	bedrock	ND	ND	ND	ND	9.24837	0.38982	7.44036	5.46976	8.94845	0.00540157	10.2361	9.84187	0.298964	1332.87	12.6951	5.08308
	TB-2OB	bedrock	ND	ND	ND	ND	10.1051	0.640236	17.4185	5.98979	6.48358	0.00961658	19.1726	15.1803	0.555443	1303.95	15.8303	7.76114
	TB-3OB	bedrock	ND	ND	ND	ND	9.26101	0.517493	12.807	4.59154	6.21775	0.00688588	15.8191	10.837	0.614176	1302.37	23.2088	4.41389
	TB-6OB	bedrock	ND	ND	ND	ND	4.93108	0.489876	3.25256	4.497	5.30545	0.00668811	7.19673	4.96653	1.33218	1232.72	7.45589	5.05876
	TB-12OB	bedrock	ND	ND	ND	ND	4.31699	0.387283	1.21051	3.43831	3.44994	0.00326207	5.22954	5.21726	0.258214	1325.76	11.368	5.37615

## Sheet: water extracts
	Table S5. Trace elements concentration in water extracts (ug/L), % leaching (of the total soil concentration), and PHREEQC-calculated redox speciation of As and Cr (mol/L) and saturation indices for Fe (oxyhydr)oxides (WHO and CCME guidelines: see References secton in the Electronic Supplementary Information text file).
																											PHREEQC results
		pH	Eh	EC	As	Cd	Co	Cr	Cu	Ni	Pb	Sb	V	Zn		As	Cd	Co	Cr	Cu	Ni	Pb	Sb	V	Zn		As(3)	As(5)	Cr(3)	Cr(6)	si_goethite	si_ferrihydrite
		std units	mV	uS/cm	ug/L	ug/L	ug/L	ug/L	ug/L	ug/L	ug/L	ug/L	ug/L	ug/L		%	%	%	%	%	%	%	%	%	%		mol/L	mol/L	mol/L	mol/L	FeOOH	Fe(OH)3
	LOD				0.2	0.06	0.2	0.3	1	0.9	1	0.02	0.14	8
	WHO drinking water2				10	3	no data	50	2000	70	10	20	no data	3000
	CCME irrigation3				100	5.1	50	no data	200 (cereals)	200	200	no data	100	5000 (pH>6.5)
	CCME livestock3				25	80	1000	no data	500 (sheep)	1000	100	no data	100	50000
	TB-1O	6.48	306.4	1253	233	0.58	18.92	2.26	112.27	13.13	6.07	1.45	0.24	415.17		25.4674	2.75237	18.8443	0.134025	10.6053	2.34868	0.993616	0.986849	0.228204	23.4896		1.571e-16	3.1106e-06	4.3475e-08	2.3325e-18	4.8201	2.1201
	TB-1A	8.272	225.5	92.07	10.66	0.31	0.21	24.93	9.39	1	1	0.38	2.12	9.14		2.18888	0.809301	0.135644	3.1321	0.778367	0.287923	0.070578	0.136194	0.506331	0.42645		9.1963e-23	1.4228e-07	4.7905e-07	4.1157e-10	5.9652	3.2652
	TB-1B	8.438	240	77.35	11.52	0.2	0.2	0.3	4.07	0.9	1	0.3	2.3	9.19		2.7895	0.543094	0.119222	0.0387748	0.505483	0.241757	0.0820708	0.130392	0.536696	0.601584		2.2454e-23	1.5376e-07	2.8635e-09	2.1378e-11	5.0153	2.3153
	TB-2O	6.133	303.5	1046	145.06	0.55	5.64	0.84	178.43	24.78	6.32	0.82	0.28	330.45		29.2541	4.29836	17.3648	0.286236	24.7709	15.7875	1.74559	1.92712	13.2788	27.7528		7.0708e-15	1.9368e-06	1.6161e-08	5.7772e-22	3.7961	1.096
	TB-2A	7.91	211.5	94.94	9.76	0.47	0.3	0.3	12.03	0.9	1.69	0.35	1.41	12.18		1.94108	0.960308	0.211394	0.0457777	0.960323	0.318441	0.0975273	0.184627	0.391116	0.562771		7.3032e-22	1.3027e-07	2.8847e-09	1.1995e-13	5.6069	2.9069
	TB-2B	8.285	223.5	78.21	9.37	0.38	0.2	0.3	5.59	0.9	1	0.27	1.55	8		2.32146	0.728678	0.12852	0.0424639	0.590778	0.285487	0.0595485	0.140266	0.409607	0.492267		2.5829e-22	1.2506e-07	2.8843e-09	5.3046e-13	5.0709	2.3709
	TB-3O	6.287	304.3	1205	115.8	0.59	6.21	1.41	120.92	21.17	4.29	0.76	0.15	518.7		20.1495	2.21956	11.249	0.137086	8.92272	4.87427	0.641744	0.939153	0.291601	20.1304		2.3008e-16	1.546e-06	2.7123e-08	2.4984e-19	4.2774	1.5774
	TB-3A	8.064	235.6	88.89	12.59	0.64	0.26	0.3	14.3	0.9	1.46	0.3	0.94	13.96		2.0663	1.11493	0.168684	0.043808	0.975044	0.305594	0.0716648	0.145726	0.254265	0.674613		5.0281e-22	1.6804e-07	2.8845e-09	3.8043e-13	5.467	2.767
	TB-3B	8.362	205.7	65.1	9.92	0.37	0.2	0.3	4.18	0.9	1	0.22	1.22	8		2.04704	0.616343	0.137945	0.0477039	0.44808	0.308996	0.0521782	0.165712	0.355741	0.554472		1.0298e-22	1.3241e-07	2.8834e-09	1.4146e-12	4.9606	2.2606
	TB-4O	6.121	331.7	331.1	33.18	0.71	4.29	1.64	36.74	3.07	2.42	0.52	0.95	41.27		5.42036	1.97445	2.56247	0.031744	3.30732	0.186081	0.253945	0.895901	0.112298	2.42332		6.8074e-17	4.4289e-07	3.1543e-08	1.9353e-19	5.1048	2.4048
	TB-4A	7.223	324.2	26.2	6.02	0.4	0.2	0.3	6.39	0.9	1	0.13	1.7	9.12		0.598839	0.951129	0.0832624	0.0236231	0.521338	0.181573	0.0631493	0.209535	0.0991625	0.527712		2.0339e-18	8.0351e-08	2.8849e-09	4.793e-19	4.8228	2.1228
	TB-4B	7.24	337.7	19.18	5.16	0.25	0.2	0.3	5.03	0.9	1	0.14	1.4	8.08		0.454332	0.454039	0.0831272	0.0232549	0.430561	0.178485	0.0536521	0.282011	0.0821217	0.452319		4.7751e-19	6.8872e-08	2.8848e-09	3.4925e-18	4.9919	2.2919
	TB-5O	5.802	378.8	433.8	51.96	0.93	4.59	1.23	81.7	4.72	4.84	0.81	0.93	72.35		8.21193	1.7541	3.79921	0.0822844	5.43551	0.816531	0.445727	0.94083	0.173031	3.65532		6.5389e-16	6.9358e-07	2.3658e-08	1.6615e-21	3.8733	1.1733
	TB-5A	8.02	269.4	104.4	15.45	0.34	0.38	0.3	13.26	0.9	1	0.46	3.21	8.56		1.18102	0.300711	0.1573	0.0234663	0.562528	0.176618	0.0296562	0.143765	0.208511	0.266064		4.0535e-22	2.0622e-07	2.8839e-09	9.7236e-13	5.6815	2.9815
	TB-5B	8.158	277.4	91.09	12.59	0.38	0.28	0.3	10.54	0.9	1	0.41	2.5	9.39		0.872511	0.253355	0.107934	0.0219303	0.408298	0.170376	0.0222125	0.259518	0.152126	0.246538		1.4593e-22	1.6804e-07	2.8816e-09	3.251e-12	5.5619	2.8619
	TB-6O	6.431	331.9	845.7	89.15	0.93	5.64	1.25	145.19	13.36	4.16	0.79	0.42	367.09		15.2862	2.24133	6.43523	0.0556205	13.1187	1.75945	0.477488	0.80455	0.196584	19.1188		2.2735e-17	1.1901e-06	2.4044e-08	4.8914e-18	4.9618	2.2617
	TB-6A	6.94	320.9	135.9	11.1	0.07	0.46	0.3	9.25	0.9	1	0.28	0.68	15.76		3.64371	0.153099	0.656941	0.0209251	0.911871	0.153277	0.114598	0.145752	0.472647	2.10363		3.632e-20	1.4816e-07	2.8849e-09	8.7333e-16	4.746	2.0459
	TB-6B	7.905	302.9	104	13.99	0.31	0.28	0.3	8.07	0.9	1	0.36	2.31	9.21		1.30701	0.275168	0.125914	0.031888	0.372415	0.22182	0.0286196	0.0848919	0.23434	0.32893		4.1713e-22	1.8673e-07	2.8838e-09	1.0107e-12	5.4053	2.7053
	TB-7O	7.85	318.8	435.5	44.5	0.06	11.98	0.3	10.19	0.9	1	0.6	1.76	52.7		8.09716	0.239209	1.79275	0.00966517	0.50964	0.0817422	0.0867199	0.81264	0.303957	0.250109		2.6361e-21	5.94e-07	2.8847e-09	3.5855e-13	6.0106	3.3106
	TB-7A	8.294	278.6	130.6	6.71	0.09	0.6	0.3	10.42	0.9	1	0.18	2.22	9.18		1.98008	0.129376	0.671214	0.0479531	0.818459	0.358382	0.0348247	0.110463	0.21248	0.280142		1.83e-23	8.9562e-08	2.8616e-09	2.3278e-11	5.5857	2.8857
	TB-7B	8.3	251.2	78.12	2.62	0.25	0.2	0.3	6.09	0.9	1	0.11	1.45	9.47		0.676388	0.364176	0.199751	0.0410637	0.44584	0.325572	0.0346727	0.06915	0.132157	0.349242		3.5328e-24	3.497e-08	2.8439e-09	4.0957e-11	5.1794	2.4794
	TB-8O	7.76	307.7	171.5	21.36	0.16	1.26	0.3	11.83	0.9	1	0.45	3.42	10.3		3.26115	0.265079	0.75332	0.0083972	0.671415	0.0692652	0.0372693	0.600265	0.280743	0.314414		2.1063e-20	2.8511e-07	2.8849e-09	5.5889e-15	5.7928	3.0928
	TB-8A	8.096	303.9	76.48	6.37	0.35	0.38	0.3	8.07	0.9	1	0.18	2.44	8.87		1.04484	0.628141	0.245205	0.0308476	0.569927	0.227511	0.0367452	0.423502	0.184748	0.355347		6.0382e-22	8.5023e-08	2.8847e-09	1.8869e-13	5.5206	2.8206
	TB-8B	7.745	320	47.12	4.2	0.35	0.2	0.3	6.15	0.9	1	0.18	1.71	10.9		0.660391	0.510318	0.117364	0.028002	0.367948	0.212477	0.0310007	0.248281	0.119695	0.381576		8.7885e-21	5.6059e-08	2.8848e-09	1.7873e-15	5.0584	2.3584
	TB-9O	7.803	325.5	202	26.24	0.06	0.62	0.3	3.01	0.9	1	0.42	4.24	8		5.61416	0.12863	0.327442	0.00363734	0.240553	0.0345326	0.0639671	0.613715	0.317694	0.225641		3.7745e-21	3.5024e-07	2.8848e-09	9.9779e-14	5.2237	2.5237
	TB-9A	7.821	315.7	139.4	12.7	0.08	1.49	0.3	7.11	1.11	1	0.27	3.95	9.63		2.81144	0.189877	1.05177	0.0305884	0.74725	0.304889	0.0583871	0.773443	0.303813	0.366882		7.8895e-22	1.6951e-07	2.8845e-09	3.5197e-13	5.3483	2.6483
	TB-9B	7.755	316.8	40.64	3.39	0.24	0.25	0.3	4.46	0.9	1	0.11	2.01	9.11		0.793679	0.567481	0.17916	0.0327212	0.596617	0.265681	0.0613181	0.281351	0.154739	0.432334		5.5456e-21	4.5248e-08	2.8849e-09	2.6423e-15	5.361	2.661
	TB-10O	6.07	352.2	280.1	39.9	0.42	1.51	1.73	23.9	2.03	1	0.71	0.97	55.23		13.578	2.49331	3.01366	0.0798753	3.716	0.252017	0.244918	1.6998	0.386928	1.71696		6.5155e-18	5.3257e-07	3.3273e-08	1.1784e-17	5.1325	2.4325
	TB-10A	8.34	256.7	55.7	4.77	0.2	0.2	0.3	3.5	0.9	1	0.08	1.99	8		1.09865	0.848354	0.160335	0.0338385	0.519065	0.292762	0.0923835	0.0592035	0.153942	0.620292		7.8268e-24	6.3667e-08	2.8502e-09	3.4669e-11	5.1777	2.4777
	TB-10B	8.45	248.2	56.54	4.95	0.16	0.2	0.3	2.64	0.9	1	0.08	2.28	11.36		1.21938	0.744418	0.148543	0.0375318	0.523615	0.287118	0.10184	0.0635851	0.182792	1.09929		3.9864e-24	6.6069e-08	2.8094e-09	7.5448e-11	5.095	2.395
	TB-11O	7.195	315.2	209.6	19.27	0.25	0.77	0.3	12.27	0.99	1	0.32	1.61	27.04		4.6877	0.965618	0.647239	0.00728347	1.27616	0.077917	0.116043	0.275697	0.170614	1.787		8.4566e-20	2.5721e-07	2.8849e-09	5.5134e-16	5.2338	2.5338
	TB-11A	7.647	301.2	120.3	5.61	0.19	0.54	0.3	4.71	0.9	1	0.17	2.66	10.81		1.48381	0.809928	0.537253	0.0392172	0.702398	0.342294	0.0999524	0.139173	0.237446	0.7568		3.2358e-22	7.4879e-08	2.8845e-09	3.8276e-13	5.2951	2.5951
	TB-11B	8.041	288.9	80.67	4.74	0.18	0.38	0.3	4.39	0.9	1	0.15	3.09	9.92		1.26132	0.639023	0.357736	0.0382663	0.786215	0.334569	0.094922	0.108515	0.252464	0.730372		1.3384e-23	6.3267e-08	2.8598e-09	2.5016e-11	5.2868	2.5868
	TB-12O	6.728	336.9	324.3	27.05	0.51	5.09	0.3	27.27	7.39	1.87	0.33	0.92	67.32		6.96126	2.60479	3.44793	0.00652238	3.35855	0.444175	0.263822	0.339738	0.109147	4.51315		4.2424e-19	3.6106e-07	2.885e-09	6.1362e-17	5.2764	2.5764
	TB-12A	7.983	295.6	81.52	5.23	0.26	0.49	0.3	5.45	0.9	1	0.13	2.8	9.36		1.38515	1.28578	0.391617	0.0378344	0.805728	0.317517	0.0972378	0.139957	0.225804	0.616749		2.6786e-23	6.9807e-08	2.8731e-09	1.1757e-11	5.4079	2.7079
	TB-12B	8.2	275.5	64.57	4.57	0.25	0.2	0.3	3.72	0.9	1	0.1	2.65	8		1.13356	0.998806	0.151057	0.0332584	0.60143	0.280484	0.0946882	0.105037	0.192896	0.57159		1.0478e-23	6.0997e-08	2.8561e-09	2.8764e-11	5.3499	2.6499

## Sheet: enrichment factors
	Table S6. Enrichment factors of individual trace elements for unburned and burned samples with respect to bedrock for the 2023 fire event based on Me/Ti molar ratios.
			As	Cd	Co	Cr	Cu	Hg	Ni	Pb	Sb	V	Zn
	TB-7-9-G	grass	31.2197	6.45609	6.9706	163.41	46.6644	240.191	59.4996	11.2299	31.2818	0.858169	171.17
	TB-10-12-G	grass	27.6726	11.1694	11.4634	315.117	52.6108	91.8136	104.81	11.039	47.5435	1.21626	356.409
	TB-10O	unburned litter	4.84909	3.09849	2.94862	44.8739	13.2805	14.3464	10.9725	5.57496	11.5235	1.57095	42.6235
	TB-11O	unburned litter	2.17344	1.52586	2.24318	27.343	6.36113	10.0493	5.54557	3.77002	10.2599	1.89467	6.42418
	TB-12O	unburned litter	2.07909	1.16774	2.81686	30.8991	5.43622	6.53225	7.34855	3.13808	8.68889	1.71264	6.40867
	median		2.17344	1.52586	2.81686	30.8991	6.36113	10.0493	7.34855	3.77002	10.2599	1.71264	6.42418
	mean		3.03387	1.9307	2.66955	34.372	8.35929	10.3093	7.95555	4.16102	10.1575	1.72608	18.4854
	TB-7O	burned litter	4.33656	2.2062	18.8047	30.7515	19.7424	3.58983	7.17187	7.52902	9.7403	1.73506	133.509
	TB-8O	burned litter	3.85531	3.9603	3.51102	26.403	12.9776	7.97037	6.31357	13.0682	7.37734	2.72297	15.4837
	TB-9O	burned litter	2.38365	2.65171	3.44377	52.8127	7.98527	1.87926	10.9722	6.597	5.83509	2.58474	14.5193
	median		3.85531	2.65171	3.51102	30.7515	12.9776	3.58983	7.17187	7.52902	7.37734	2.58474	15.4837
	mean		3.52518	2.9394	8.58651	36.6557	13.5684	4.47982	8.15255	9.06475	7.65091	2.34759	54.5039
	TB-10A	unburned topsoil	1.46921	0.889264	1.50535	3.7668	2.85523	3.22581	0.858759	3.03088	7.64485	1.66118	3.50453
	TB-11A	unburned topsoil	1.60118	1.10743	1.51804	4.06759	3.55355	7.12179	0.919213	3.50591	8.64872	1.80165	4.85748
	TB-12A	unburned topsoil	1.2533	0.748185	1.48114	3.30461	2.80948	3.7548	0.77668	2.82457	5.15465	1.56305	4.04508
	TB-7A	burned topsoil	1.81653	4.15667	1.70886	4.2106	8.53972	4.08664	1.11126	12.7366	14.6036	2.12684	14.1051
	TB-8A	burned topsoil	3.21654	3.27691	2.91587	6.44225	9.34813	11.3312	1.72289	11.8806	3.74903	2.6461	10.575
	TB-9A	burned topsoil	2.25967	2.34932	2.52725	6.15988	5.95585	4.2427	1.50338	7.08912	2.91949	2.46978	10.5434
	TB-10B	unburned subsoil	1.51445	0.893815	1.79135	3.74412	2.35371	3.71427	0.965363	3.03119	7.84741	1.76712	3.09576
	TB-11B	unburned subsoil	1.46749	1.22612	1.4793	3.84385	2.72846	6.75931	0.86716	3.40405	9.02461	1.81501	4.25894
	TB-12B	unburned subsoil	1.25257	0.86685	1.46701	3.51875	2.40469	3.80706	0.822971	2.71503	4.94528	1.62088	3.49179
	TB-7B	burned subsoil	1.84402	3.64287	1.69987	4.36678	8.1371	5.52758	1.08636	11.3609	12.6609	1.98351	10.3656
	TB-8B	burned subsoil	3.09113	3.71578	2.95376	6.5379	10.1655	12.8741	1.69948	12.9729	5.89112	2.63686	11.1487
	TB-9B	burned subsoil	1.97512	2.17997	2.30117	5.32312	4.3256	6.92138	1.29312	6.24005	3.02261	2.28103	7.82433
	TB-12OB	bedrock	1	1	1	1	1	1	1	1	1	1	1

## Sheet: Pb isotopes
	Table S7. Lead isotopic compositions in grass, litter, topsoil, subsoil, and bedrocks from the burned and unburned sites. Additional tables summarize potential Pb sources (with indication if taken from the literature, see References secton in the Electronic Supplementary Information text file).
	This study:							Other studies:
	Code	Sample	206Pb/207Pb		208Pb/206Pb			Code	Sample	206Pb/207Pb		208Pb/206Pb
			Mean	SD	Mean	SD				Mean	SD	Mean	SD
	TB-1G	grass	1.13131	0.0053968	2.13018	0.0113563		Tsumeb ores	28/T1	1.1554		2.11318		Kamona et al. (1999)4
	TB-2G	grass	1.12135	0.00409616	2.14774	0.00753506			28/T2	1.15462		2.11385		https://doi.org/10.1007/s001260050203
	TB-3G	grass	1.13173	0.00356082	2.13678	0.0119226			28/T3	1.15655		2.11337
	TB-4G	grass	1.13443	0.00235187	2.12859	0.0115061			28/T4	1.15555		2.11307
	TB-5G	grass	1.14529	0.00442459	2.12682	0.0117111
	TB-6G	grass	1.1545	0.00396799	2.11388	0.0205607		Tsumeb slags	Cu slag T2	1.13151	0.00415264	2.13602	0.00780329	Mihaljevič et al. (2015)5
	TB-7-9-G	grass	1.13996	0.00442843	2.13042	0.00679619			Cu slag T19	1.15013	0.0033744	2.11754	0.00592854	https://doi.org/10.1007/s11270-015-2440-4
	TB-10-12-G	grass	1.14719	0.00563072	2.13365	0.0169262			Pb slag T18-2	1.151	0.00288281	2.11415	0.00559702
	TB-1O	litter	1.16696	0.00407018	2.10487	0.0100483			Pb slag T 17-2	1.1438	0.00260501	2.12416	0.00696827
	TB-2O	litter	1.15985	0.00410534	2.1154	0.00729391
	TB-3O	litter	1.15928	0.0036404	2.112	0.00807296		Tsumeb tailings	T 21	1.15	0.00355658	2.10821	0.00594263
	TB-4O	litter	1.18279	0.00280234	2.06779	0.010009			T 22	1.15685	0.00293358	2.10662	0.00578441
	TB-5O	litter	1.16896	0.00385481	2.08591	0.00728292			T 23	1.15534	0.00211469	2.11159	0.00381202
	TB-6O	litter	1.16056	0.00368523	2.10239	0.0109193			T 23 B	1.15842	0.00378028	2.11115	0.00730681					Tsumeb ore mining signature
	TB-7O	burned litter	1.15956	0.00328904	2.10559	0.00892204												median:	1.15498
	TB-8O	burned litter	1.16145	0.00335749	2.10262	0.0102895		gasoline	Tsumeb gasoline (2012)	1.15	0.003	2.12	0.005
	TB-9O	burned litter	1.17856	0.00449929	2.08449	0.00499051
	TB-10O	litter	1.16527	0.00379707	2.10586	0.00479537		Tsumeb smelter materials	roaster flue dust T7	1.18919	0.00804521	2.0675	0.0244926	this study
	TB-11O	litter	1.16752	0.0046491	2.10139	0.0101005			boiler dust T8	1.19183	0.0178028	2.09301	0.039123
	TB-12O	litter	1.17421	0.00306791	2.08994	0.00573653			cooling flue gas residue T9	1.19298	0.0183967	2.07318	0.0367897
	TB-1A	topsoil	1.16323	0.00205515	2.10705	0.00864741			bag housed dust T16	1.1887	0.013036	2.08194	0.0424861
	TB-2A	topsoil	1.15546	0.00330348	2.1159	0.00687972
	TB-3A	topsoil	1.15447	0.00335904	2.11612	0.00999167		aerosols South Africa	Namib desert	1.141		2.12182		Bollhöfer and Rosman (2000)6				South African aerosols signature
	TB-4A	topsoil	1.18502	0.00337537	2.06482	0.0109351			Windhoek	1.076		2.1868		https://doi.org/10.1016/S0016-7037(00)00436-1				median:	1.076
	TB-5A	topsoil	1.17019	0.003425	2.08648	0.006523			East London	1.069		2.19083
	TB-6A	topsoil (char)	1.15809	0.00302983	2.10608	0.0046196			Pretoria	1.067		2.19306
	TB-7A	topsoil	1.13839	0.00228243	2.13147	0.0088216			Cape Town	1.085		2.16866
	TB-8A	topsoil	1.16407	0.00172507	2.10098	0.00650871
	TB-9A	topsoil	1.17598	0.00352049	2.09269	0.0065282
	TB-10A	topsoil	1.16403	0.00433209	2.11215	0.0101211		Namib desert dusts	Huab fine dust	1.22217		2.05255		Gili et al. (2022)7
	TB-11A	topsoil	1.17125	0.0107023	2.103	0.00963004			Huab fine dust	1.22483		2.05243		https://doi.org/10.1038/s43247-022-00464-z
	TB-12A	topsoil	1.16829	0.00345634	2.10564	0.00932521			Huab fine dust	1.22549		2.05052
	TB-1B	subsoil	1.16278	0.00234221	2.10398	0.00834287			Huab fine dust	1.22354		2.05209
	TB-2B	subsoil	1.1569	0.00353157	2.10752	0.00778133			Huab fine dust	1.22502		2.05212
	TB-3B	subsoil	1.15072	0.00247001	2.12049	0.00576314			Huab bulk dust	1.22058		2.0502
	TB-4B	subsoil	1.17827	0.00468749	2.07062	0.00723406			Huab bulk dust	1.20477		2.06098
	TB-5B	subsoil	1.15529	0.0031223	2.11954	0.005364			Huab bulk dust	1.2165		2.05526
	TB-6B	subsoil	1.15876	0.00335802	2.10818	0.00521323			Huab bulk dust	1.22674		2.05086
	TB-7B	subsoil	1.14362	0.00235554	2.12958	0.00550812			Huab bulk dust	1.22886		2.04821
	TB-8B	subsoil	1.16132	0.00306043	2.10647	0.00749004			Huab bulk dust	1.21584		2.0547
	TB-9B	subsoil	1.17156	0.00242649	2.09002	0.00450274			Huab bulk dust	1.21593		2.05253
	TB-10B	subsoil	1.16298	0.00369152	2.11214	0.00904834			Huab bulk dust	1.21792		2.0559
	TB-11B	subsoil	1.16604	0.00338199	2.10804	0.0114692			Huab bulk dust	1.22335		2.04875
	TB-12B	subsoil	1.16994	0.00410507	2.09494	0.00756361			Omaruru bulk dust	1.212		2.05319
	TB-1OB	bedrock	1.18547	0.00294287	2.07153	0.00589228			Omaruru bulk dust	1.20738		2.06058
	TB-2OB	bedrock	1.18342	0.0044785	2.07486	0.00652455			Omaruru bulk dust	1.181		2.06602
	TB-3OB	bedrock	1.18193	0.00263365	2.0846	0.00852462			Omaruru bulk dust	1.18596		2.05907
	TB-6OB	bedrock	1.20967	0.00525663	2.01999	0.00694112			Kuiseb bulk dust	1.2773		2.0452
	TB-12OB	bedrock	1.18497	0.00287725	2.07611	0.00772588			Kuiseb bulk dust	1.27395		2.04963
									Kuiseb bulk dust	1.24883		2.03481
									Kuiseb bulk dust	1.2718		2.03826
									Kuiseb bulk dust	1.23059		2.02797
								Tsumeb dust	dust wipes TD005	1.15		2.12174		Fry et al. (2020)8
									TD009	1.15		2.12174		https://doi.org/10.1016/j.envpol.2020.114235
									TD017	1.15		2.12174
									TD023	1.15		2.12174
									TD029	1.17		2.09402
									TD031	1.16		2.11207
									TD033	1.15		2.11304
									TD047	1.15		2.13043
									TD051	1.16		2.10345
									TD059	1.13		2.13274
									TD062	1.14		2.12281
									TD063	1.15		2.11304
									TD066	1.15		2.12174
									TD068	1.15		2.11304
									TD069	1.15		2.11304
									TD070	1.15		2.10435
									TD074	1.15		2.12174
									TD076	1.14		2.12281
									TD078	1.14		2.12281
									TD084	1.13		2.13274
									TD085	1.16		2.10345
									TD091	1.16		2.11207

## Sheet: correlations
	Table S8. Correlation matrix for trace element leaching data, soil properties, and total trace element concentrations in soil (Spearman correlation coefficients, statistically significant values are in bold and correspond to p-values < 0.05).
		Cd leach	Co leach	Cr leach	Cu leach	Ni leach	Pb leach	Sb leach	V leach	Zn leach	As tot	Cd tot	Co tot	Cr tot	Cu tot	Ni tot	Pb tot	Sb tot	V tot	Zn tot	soil pH	Corg
	As leach	0.416377	0.812582	0.60267	0.769983	0.718564	0.630247	0.939665	-0.412639	0.628778	0.310158	-0.203669	-0.0915294	0.497361	0.26979	0.575327	-0.409705	-0.0966662	-0.575401	0.228616	-0.600541	0.85205
	Cd leach		0.215683	0.586209	0.663961	0.569884	0.743726	0.471381	-0.661728	0.41979	0.406625	-0.037438	-0.11643	0.0479964	0.165249	0.113896	-0.193081	-0.015011	-0.402165	-0.0396238	-0.428802	0.35135
	Co leach			0.522295	0.725253	0.698477	0.58729	0.749	-0.283706	0.731288	0.0327408	-0.36325	-0.34624	0.489228	0.115247	0.434798	-0.522611	-0.31138	-0.458803	0.197838	-0.700419	0.768087
	Cr leach				0.62672	0.819208	0.630341	0.661721	-0.549229	0.551885	0.145311	-0.363299	-0.396083	0.229273	-0.0358985	0.242078	-0.544843	-0.150579	-0.576092	0.0223717	-0.545621	0.593436
	Cu leach					0.726769	0.737206	0.800386	-0.592445	0.745925	0.335136	-0.0491793	-0.242984	0.321792	0.393873	0.363086	-0.276741	-0.0492341	-0.540902	0.247152	-0.65905	0.725529
	Ni leach						0.740224	0.659102	-0.585038	0.694483	0.0669191	-0.472664	-0.460641	0.333247	-0.111713	0.323759	-0.654186	-0.288909	-0.554027	-0.088051	-0.674154	0.632687
	Pb leach							0.619396	-0.711436	0.705575	0.264758	-0.275236	-0.348678	0.11576	0.0741268	0.130644	-0.470485	-0.0839426	-0.59796	-0.138447	-0.576334	0.592299
	Sb leach								-0.39096	0.608601	0.392503	-0.0512655	-0.0376095	0.438699	0.399871	0.52759	-0.271603	-0.015454	-0.571318	0.361517	-0.58153	0.861117
	V leach									-0.6	-0.0688767	0.227858	0.412435	-0.0732351	0.00810863	-0.145174	0.470687	0.0301178	0.697773	0.250225	0.506147	-0.496268
	Zn leach										0.0206252	-0.398685	-0.456918	0.314453	0.0489723	0.284536	-0.58277	-0.141891	-0.608068	-0.0295141	-0.673842	0.736599
	As tot											0.45451	0.591682	0.299215	0.699755	0.345671	0.407622	-0.0517574	0.21361	0.406232	-0.191347	0.030383
	Cd tot												0.461405	-0.0995172	0.736724	-0.00875386	0.899195	0.30692	0.316531	0.549247	0.306187	-0.248713
	Co tot													0.234745	0.503991	0.321169	0.615345	0.0559346	0.54477	0.401867	0.270568	-0.322456
	Cr tot														0.256211	0.961194	-0.246364	-0.379714	0.13735	0.27663	-0.595005	0.389472
	Cu tot															0.336572	0.634573	0.167332	0.123705	0.756517	-0.0602472	0.145441
	Ni tot																-0.184182	-0.269387	0.0212383	0.318316	-0.540387	0.458687
	Pb tot																	0.262968	0.521336	0.562399	0.533857	-0.51715
	Sb tot																		-0.238785	-0.0876617	0.51931	0.0597207
	V tot																			0.201081	0.287673	-0.750676
	Zn tot																				-0.0267782	0.0534174
	soil pH																					-0.622385
